# Supplementary material for: A poly-(styrene-acrylonitrile) copolymer-derived hierarchical architecture in electrode materials for lithium-ion batteries
Source: Royal Society of Chemistry journal article supplement (doi:10.1039/c6ta04102g), 2016-01-01
Supplement: c6ta04102g1.pdf [file c6ta04102g1.pdf]

## Electronic Supplementary Information for

# Poly-(styrene-acrylonitrile) copolymer-derived hierarchical architecture in electrode materials for lithium ion batteries

Lu Jin<sup>a</sup>, Guobo Zeng<sup>b</sup>, HuaWu<sup>a\*</sup>, MarkusNiederberger<sup>b</sup> and Massimo Morbidelli<sup>a\*</sup>

a. Institute for Chemical and Bioengineering, Department of Chemistry and Applied Biosciences, ETH Zurich, 8093 Zurich, Switzerland.

b. Laboratory for Multifunctional Materials, Department of Materials, ETH Zurich, 8093 Zurich, Switzerland.

### (1) Characterization of the composition in TiO<sub>2</sub>/C materials

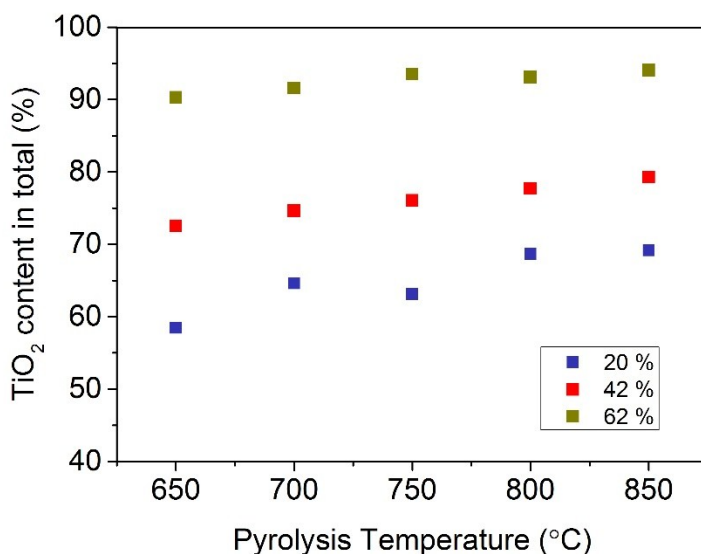

**Fig. S1** TiO<sub>2</sub> weight fraction from TGA measurements for samples, 20TP, 42TP and 62TP, pyrolyzed at different temperatures.

**Table S1** TiO<sub>2</sub> weight fraction from TGA measurements for samples, 20TP, 42TP and 62TP, pyrolyzed at different temperatures.

| T, °C | In 62TP, % | In TP, % | In 20TP, % |
|-------|------------|----------|------------|
| 650   | 90.3       | 72.5     | 58.5       |
| 700   | 91.6       | 74.6     | 64.6       |
| 750   | 93.5       | 76.0     | 63.1       |
| 800   | 93.1       | 77.7     | 68.7       |
| 850   | 94.0       | 79.3     | 69.2       |

**Table S2** Intensity peak fractions of D1, D3 and G bands in Figure 3c.

| T, °C | D1, % | D3, % | G, % |
|-------|-------|-------|------|
| 650   | 54    | 21    | 26   |
| 700   | 47    | 13    | 40   |
| 750   | 47    | 13    | 40   |
| 800   | 49    | 10    | 40   |
| 850   | 50    | 11    | 39   |

**(2) Electrochemical performance tests of poly-(styrene-acrylonitrile) derived carbon electrode in the absence of TiO<sub>2</sub>**

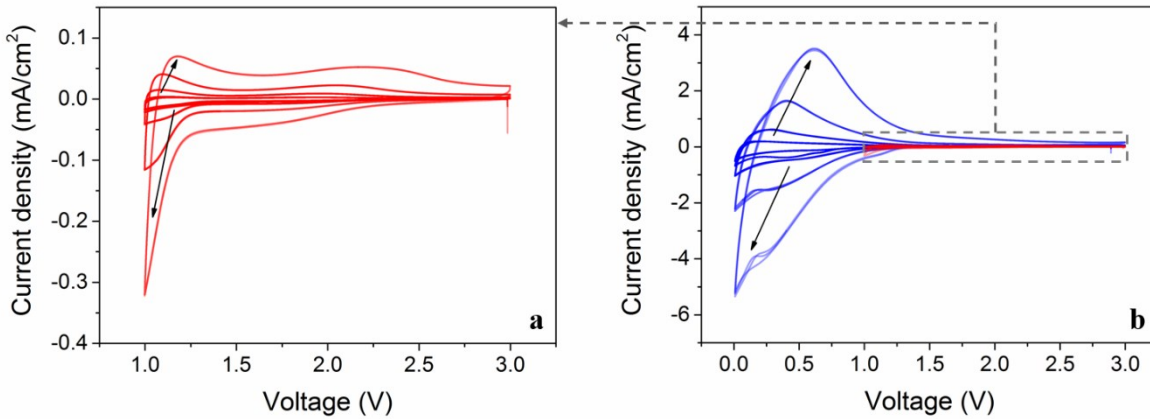

**Fig. S2** CV curves of the cells prepared using poly-(styrene-acrylonitrile) derived carbon network as the anode in the absence of TiO<sub>2</sub>, in voltage range of (a) 1.0-3.0 V and (b) 0-3.0 V at scan rates of 0.1, 0.33, 0.5 and 1.0 mV/s. It is seen from Fig S2a that in 1.0-3.0 V, the current density is very small, indicating that the intercalation of lithium into the carbon structure within this potential window is rather limited. In Fig. S2b, a broad rectangular shape of redox voltage profile can be seen in 0-1.0 V, while in 1.0-3.0 V, the curves are relatively flat without distinguished redox peaks. Therefore, the capacitive phenomenon enhancing capacity mainly occurs in 0-1.0 V. During the Li intercalation process, an evident peak is detected around 0.25-0.5 V, which is attributed to the formation of the SEI film on the surface of carbon, resulting in the irreversible consumption of Li ions in electrolyte.

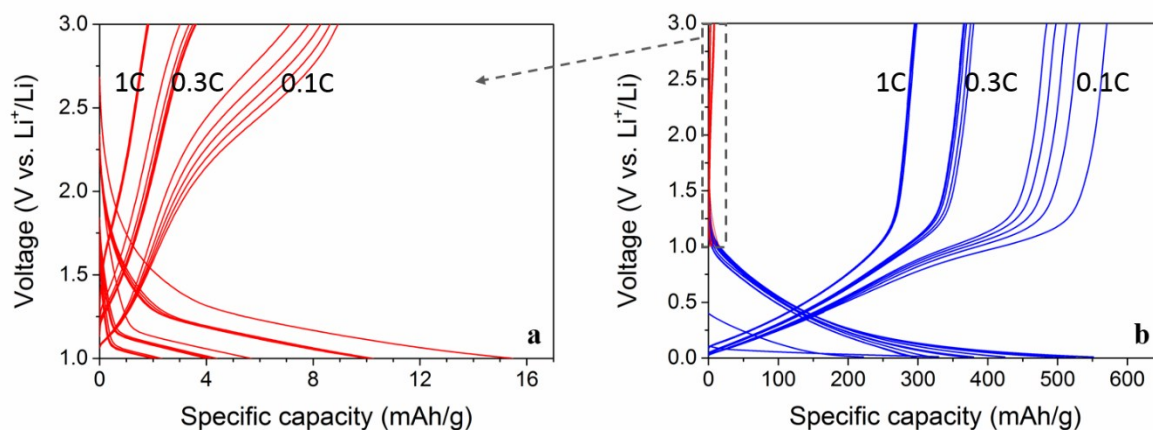

**Fig. S3** Charge/discharge specific capacity of the cells prepared using poly-(styrene-acrylonitrile) derived carbon network as the anode in the absence of TiO<sub>2</sub>, in the voltage range of (a) 1.0-3.0 V and (b) 0-3.0 V at different C rates. (1C=165 mAh/g). From Fig. S3a, the specific capacity is only around 2 mAh/g at 1C. In Fig. S3b, considerable capacity (~300 mAh/g at 1C current density) is obtained in the voltage range, 0-1.0 V. Still, the capacity contribution in 1.0-3.0 V is negligible, which is in coherence with the results in Fig. S2 and in the literature.

(3) Repetition tests of long-term cycling performance of various composite samples.

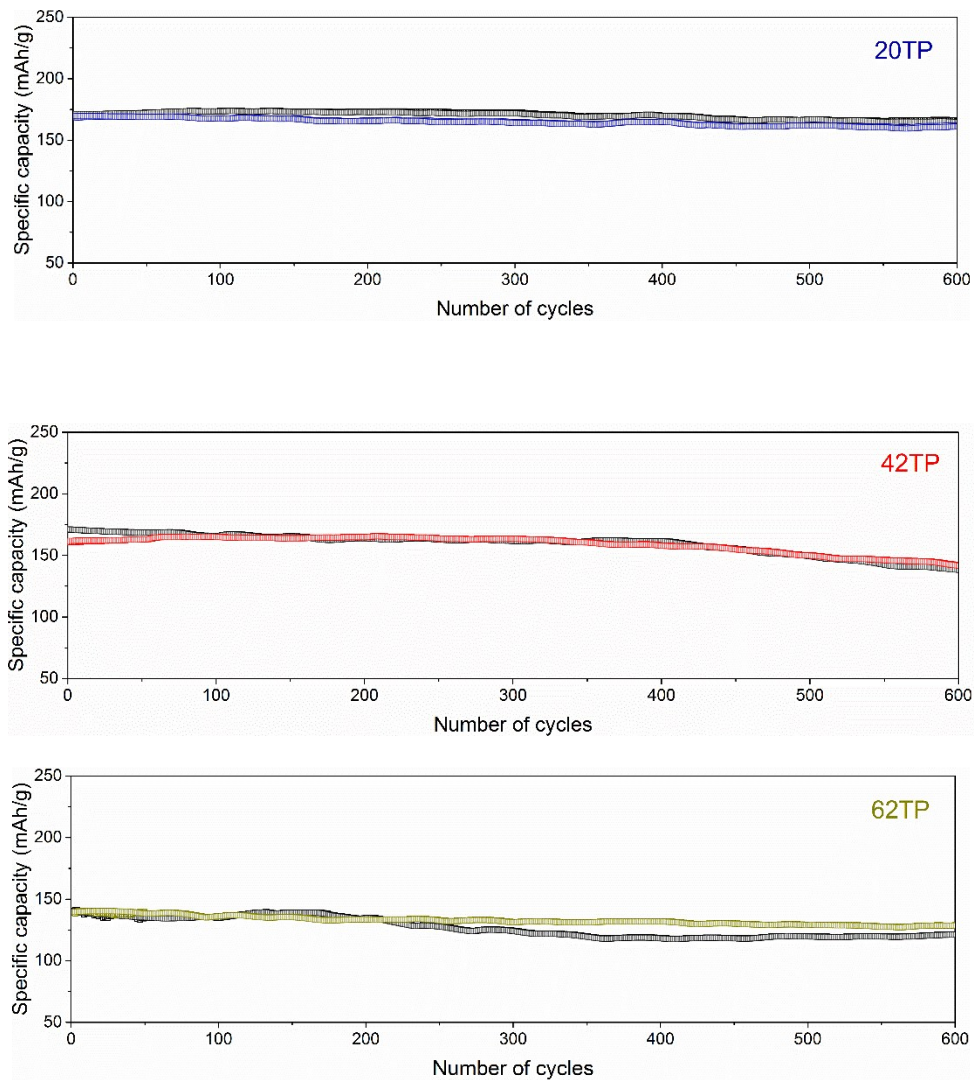

**Fig. S4** Repeated tests of long-term cycling performance of various composite samples (black curves stand for another running).
